# Supplementary material for: Urea-assisted synthesis of a Fe nanoparticle modified N-doped three-dimensional porous carbon framework for a highly efficient oxygen reduction reaction
Source: Royal Society of Chemistry journal article supplement (doi:10.1039/c9nj06289k), 2020-01-01
Supplement: c9nj06289k1.pdf [file c9nj06289k1.pdf]

## Supporting Information

### **Urea-assisted Synthesis of Fe Nanoparticles Modified N-doped Three-Dimensional Porous Carbon Framework for Highly Efficient Oxygen Reduction Reaction**

Hui Peng<sup>a\*‡</sup>, Xuan Xie<sup>a‡</sup>, Kanjun Sun<sup>b</sup>, Miaoran Zhang<sup>a</sup>, Rui Zhao<sup>a</sup>, Guofu Ma<sup>a\*</sup>, Ziqiang Lei<sup>a</sup>

<sup>a</sup>Key Laboratory of Eco-Environment-Related Polymer Materials of Ministry of Education, Key Laboratory of Polymer Materials of Gansu Province, College of Chemistry and Chemical Engineering, Northwest Normal University, Lanzhou 730070, China.

<sup>b</sup>College of Chemistry and Environmental Science, Lanzhou City University, Lanzhou 730070, China.

‡These authors contributed equally to this work. They should thus be considered co-first authors.

\*Corresponding authors. E-mail addresses: penghui@nwnu.edu.cn (H. Peng), magf@nwnu.edu.cn (G. Ma)

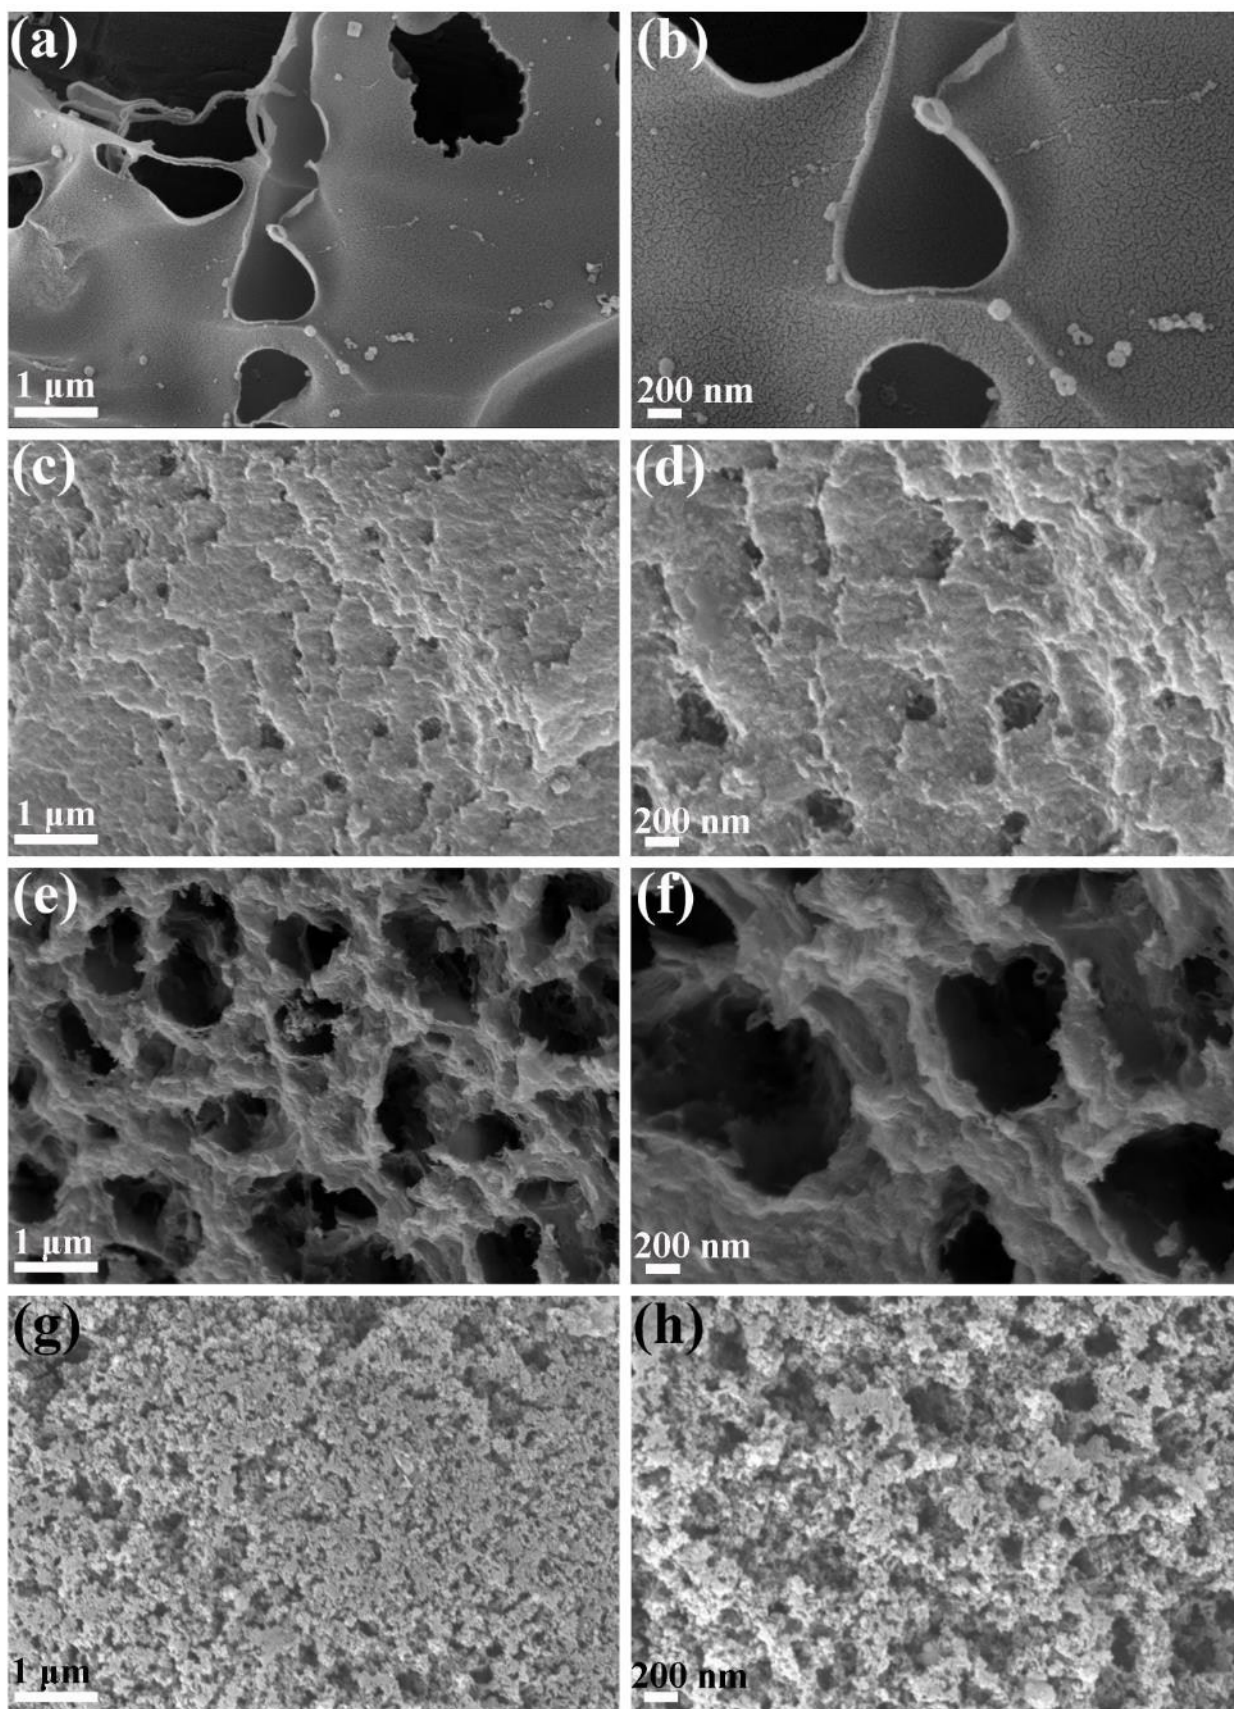

**Figure S1.** SEM images of (a, b) Fe/3DNC-0, (c, d) Fe/3DNC-1, (e, f) 3DNC-2 and (g, h) Fe/3DNC-3 at different magnification.

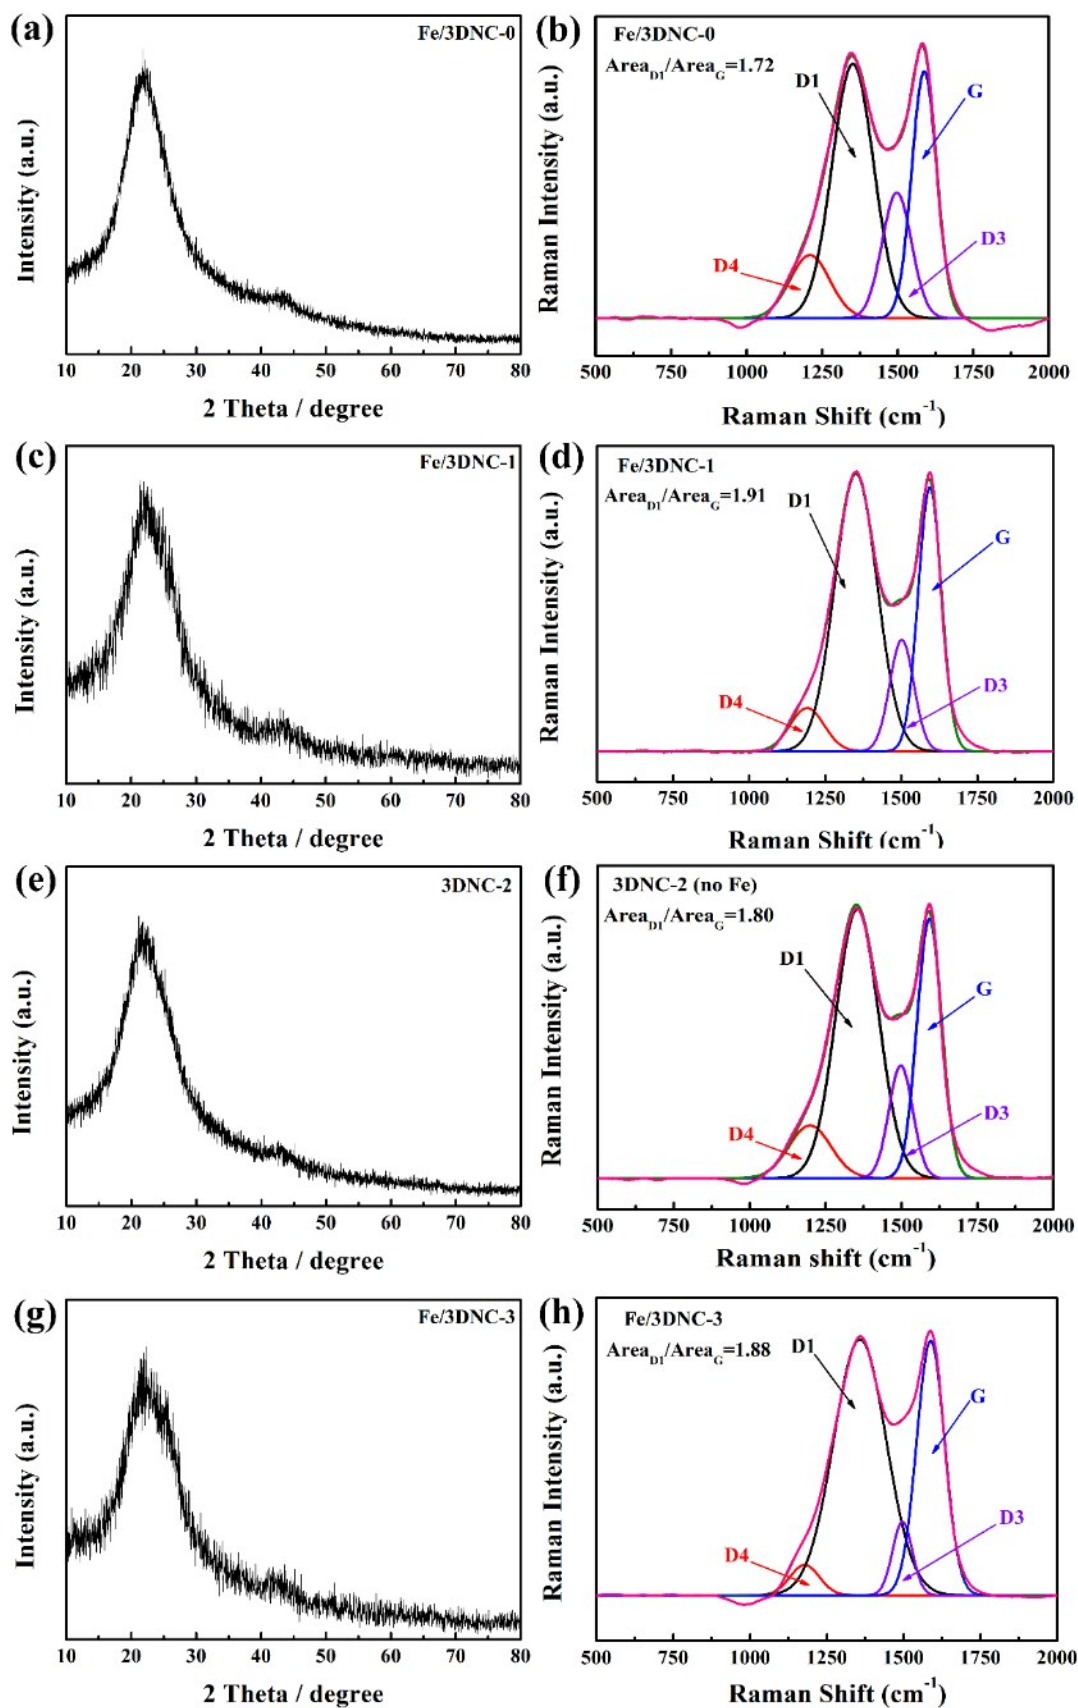

**Figure S2.** XRD patterns and Raman spectra of (a, b) Fe/3DNC-0, (c, d) Fe/3DNC-1, (e, f) 3DNC-2 and (g, h) Fe/3DNC-3.

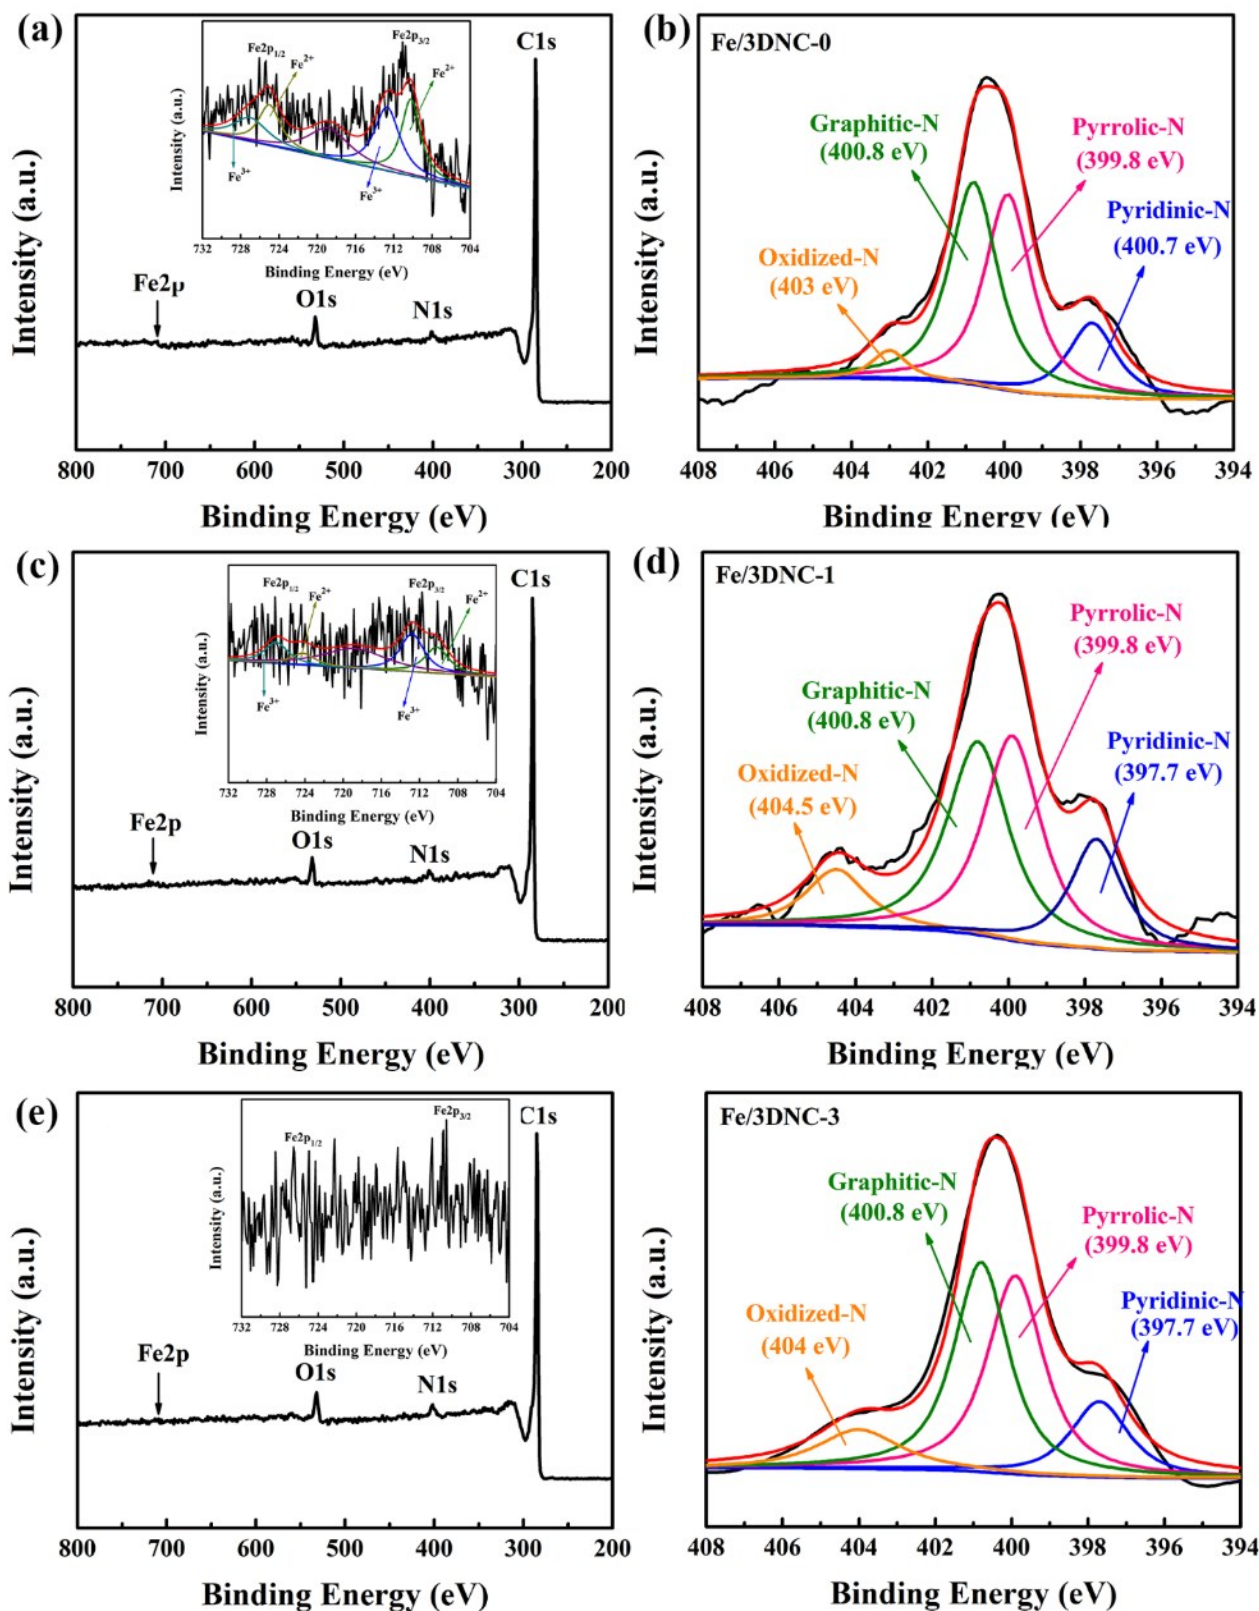

**Figure S3.** XPS survey spectrum of (a-b) Fe/3DNC-0, (c-d) Fe/3DNC-1, (e-f) Fe/3DNC-3 (The inset shows Fe 2p) and the high-resolution XPS spectra of N1s.

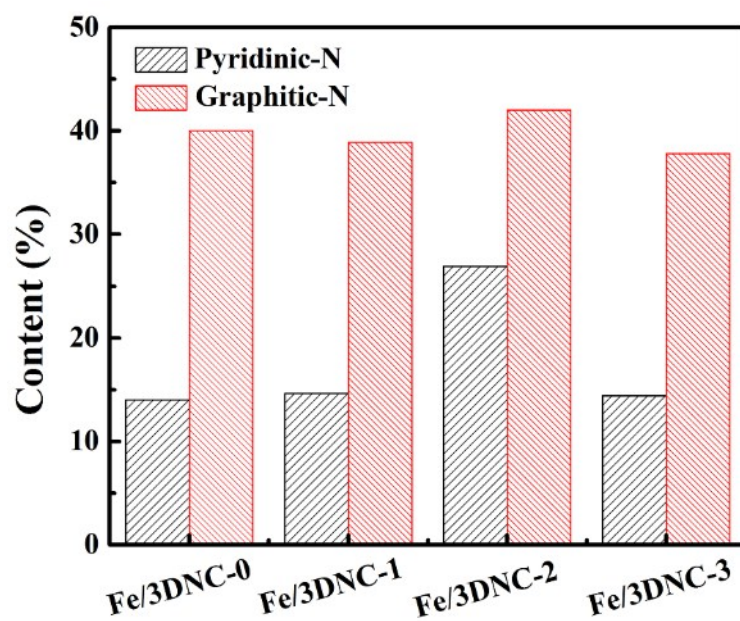

**Figure S4.** Histogram of pyridinic-N and graphitic-N contents in the Fe/3DNC catalysts.

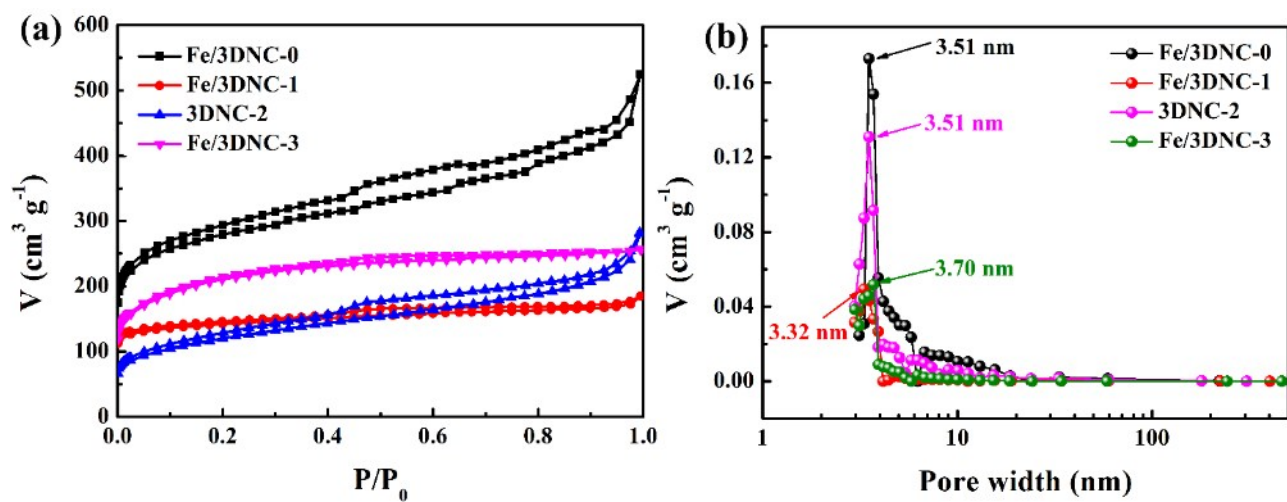

**Figure S5.** (a)  $\text{N}_2$  adsorption/desorption isotherms and (b) pore size distribution of Fe/3DNC-0, Fe/3DNC-1, 3DNC-2 and Fe/3DNC-3.

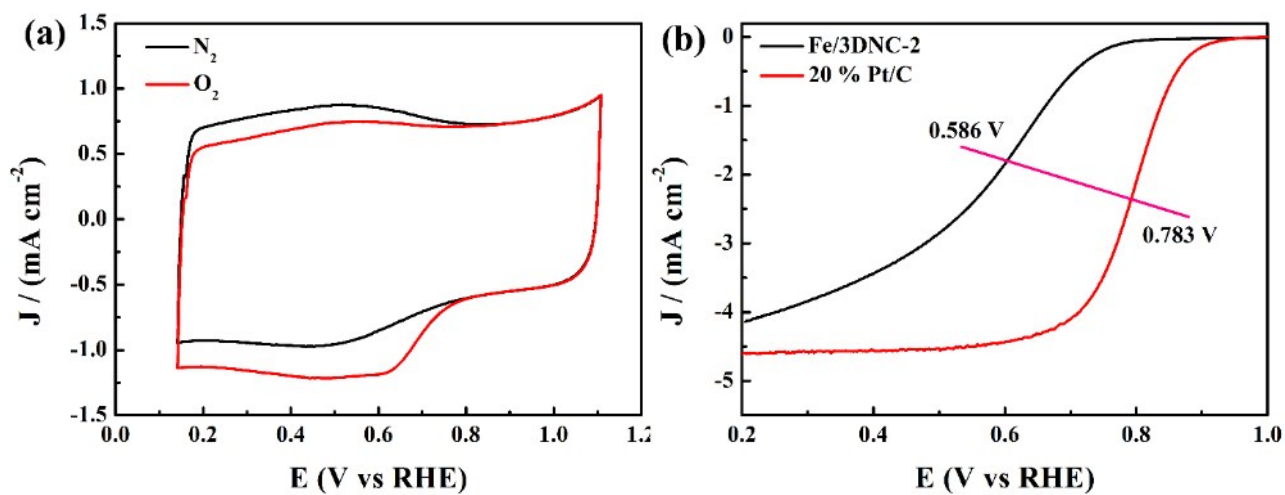

**Figure S6.** (a) CV curves of Fe/3DNC-2 catalyst in N<sub>2</sub> saturated (Black line) and O<sub>2</sub> saturated (Red line) 0.1 M HClO<sub>4</sub> electrolyte (scan rate: 50 mV s<sup>-1</sup>), (b) LSV curves of the Fe/3DNC-2 and 20 % Pt/C catalysts (rotation speed: 1600 rpm; scan rate: 5mV s<sup>-1</sup>),

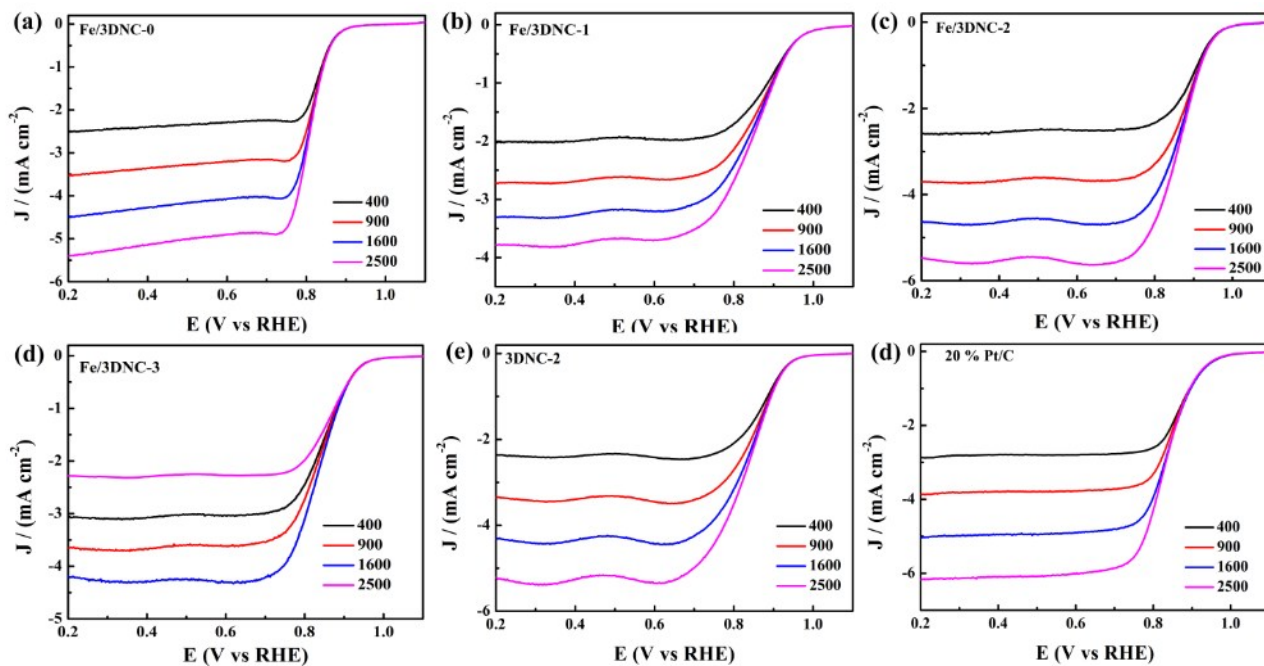

**Figure S7.** LSV curves at different rotating speeds for (a) Fe/3DNC-0, (b) Fe/3DNC-1, (c) Fe/3DNC-2, (d) Fe/3DNC-3, (e) 3DNC-2 and (f) Pt/C in O<sub>2</sub>-saturated 0.1 M KOH electrolyte.



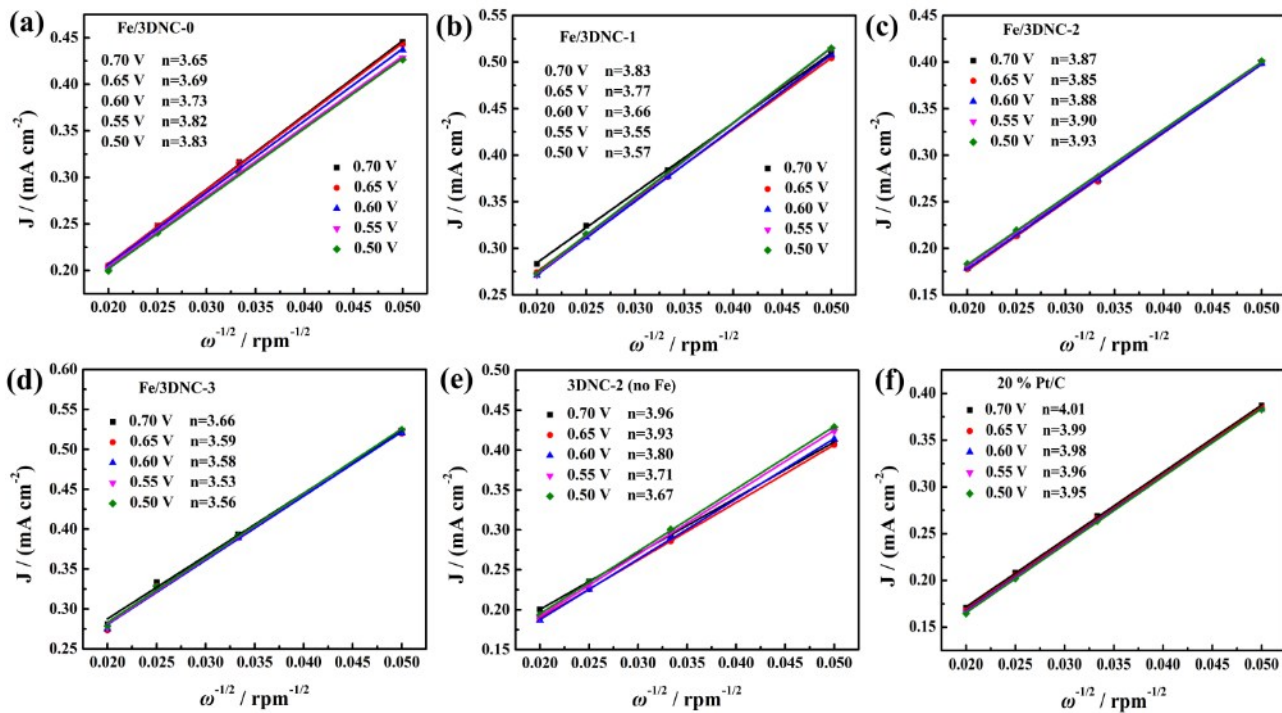

**Figure S8.** K-L plots and transferred electron numbers at various potential for (a) Fe/3DNC-0, (b) Fe/3DNC-1, (c) Fe/3DNC-2, (d) Fe/3DNC-3, (e) 3DNC-2 and (f) Pt/C in O<sub>2</sub>-saturated 0.1 M KOH electrolyte.

**Table S1.** X-ray photoelectron spectroscopy (XPS) and Full spectrum direct reading inductively coupled plasma optical emission spectrometer (ICP-OES) results for element contents in Fe/3DNC-2 samples.

|     | C (wt %) | N (wt %) | O (wt %) | Fe (wt %) |
|-----|----------|----------|----------|-----------|
| XPS | 94.09    | 2.50     | 3.32     | 0.09      |
| ICP | –        | –        | –        | 1.18      |

**Table S2.** The element contents by XPS for Fe/3DNC-0, Fe/3DNC-1, Fe/3DNC-2 and Fe/3DNC-3 samples.

| XPS       | C (wt %) | N (wt %) | O (wt %) | Fe (wt %) |
|-----------|----------|----------|----------|-----------|
| Fe/3DNC-0 | 93.72    | 2.41     | 3.46     | 0.41      |
| Fe/3DNC-1 | 93.89    | 2.33     | 3.65     | 0.13      |
| Fe/3DNC-2 | 94.09    | 2.50     | 3.32     | 0.09      |
| Fe/3DNC-3 | 94.01    | 2.65     | 3.42     | 0         |

**Table S3.** BET surface area and pore structure characterization parameters of all catalysts.

| catalysts | $S_{\text{BET}}$ ( $\text{m}^2 \text{g}^{-1}$ ) | Average pore<br>Diameter (nm) | Total pore Volume<br>( $\text{cm}^3 \text{g}^{-1}$ ) |
|-----------|-------------------------------------------------|-------------------------------|------------------------------------------------------|
| Fe/3DNC-0 | 812                                             | 3.61                          | 0.790                                                |
| Fe/3DNC-1 | 408                                             | 3.31                          | 0.282                                                |
| Fe/3DNC-2 | 438                                             | 2.65                          | 0.296                                                |
| 3DNC-2    | 430                                             | 2.62                          | 0.439                                                |
| Fe/3DNC-3 | 763                                             | 2.08                          | 0.389                                                |

**Table S4.** Comparison of Fe/3DNC-2 with some M-N-C catalysts reported in literatures.

| Catalysts               | Loading Mass<br>(mg cm <sup>-2</sup> ) | E <sub>onest</sub><br>(V vs RHE) | E <sub>1/2</sub><br>(V vs RHE) | Reference |
|-------------------------|----------------------------------------|----------------------------------|--------------------------------|-----------|
| Fe/3DNC-2               | 0.20                                   | 0.995                            | 0.874                          | This work |
| Zn/Fe <sub>2</sub> -N-C | 0.34                                   | 1.08                             | 0.86                           | [1]       |
| Fe(0)@FeNC              | 0.3                                    | 0.946                            | 0.852                          | [2]       |
| Fe-N-C/MXene            | -                                      | 0.92                             | 0.84                           | [3]       |
| Fe-NAHPC-900            | 0.23                                   | 0.94                             | 0.86                           | [4]       |
| Cu-Fe-N-C               | -                                      | 0.967                            | 0.864                          | [5]       |
| Fe <sub>DZ</sub> -NC    | -                                      | 0.98                             | 0.863                          | [6]       |

## References

- [1] J. L. Xue, Y. S. Li and J. Hu, *J. Mater. Chem. A*, 2020.
- [2] Z. T. Li, L. Q. Wei, W. J. Jiang, Z. P. Hu, H. Luo, W. N. Zhao, T. Xu, W. T. Wu, M. B. Wu and J. S. Hu, *Appl. Catal. B-Environ.*, 2019, 251, 240-246.
- [3] L. L. Jiang, J. J. Duan, J. W. Zhu, S. Chen and M. Antonietti, *ACS Nano*, 2020.
- [4] P. F. Tian, Y. H. Wang, W. Li, S. W. Song, S. Y. Zhou, H. W. Gao, H. Q. Xu, X. Q. Tian and J. B. Zang, *J. Catal.*, 2020, 382, 109-120.
- [5] J. S. Li, J. J. Chen, H. Wan, J. Xiao, Y. G. Tang, M. Liu and H. Y. Wang, *Appl. Catal. B-Environ.*, 2019, 242, 209-217.
- [6] M. L. Mao, J. Deng, T. T. Yan, J. J. Shen, J. P. Zhang, L. Y. Shi and D. S. Zhang, *ACS Sustainable Chem. Eng.*, 2019, 7, 19268-19276.
